# Supplementary material for: A well-designed P2-Na0.67Mn0.85Al0.05Zn0.1O2 cathode for superior sodium-ion batteries
Source: Royal Society of Chemistry journal article supplement (doi:10.1039/d4ta04224g), 2024-01-01
Supplement: d4ta04224g1.pdf [file d4ta04224g1.pdf]

**A well-designed P2-Na<sub>0.67</sub>Mn<sub>0.85</sub>Al<sub>0.05</sub>Zn<sub>0.1</sub>O<sub>2</sub> cathode for superior sodium-ion battery**

Xiang Ding <sup>a,\*</sup>, Cuixian Hu <sup>a</sup>, Yong Fan <sup>a</sup>, Yue Lin <sup>b</sup>, Jinyang Liu <sup>c</sup>, Yibing Yang <sup>b</sup>,  
Liangwei Liu <sup>b</sup>, Haibao Ma <sup>b</sup>, Yi Xiao <sup>b</sup>, Lili Han <sup>b,\*</sup>

<sup>a</sup> College of Chemistry and Materials Science, Fujian Normal University, Fuzhou 350007, China.

<sup>b</sup> State Key Laboratory of Structural Chemistry, Fujian Institute of Research on the Structure of Matter, Chinese Academy of Sciences, Fuzhou 350002, China.

<sup>c</sup> College of Physics and Energy, Fujian Normal University, Fuzhou 350007, China.

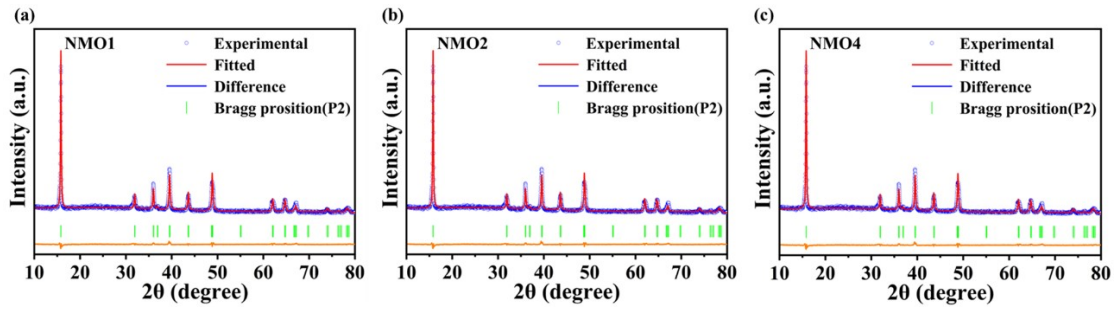

**Fig. S1.** XRD patterns; Rietveld refinement of (a) NMO1, (b) NMO2, and (c) NMO4.

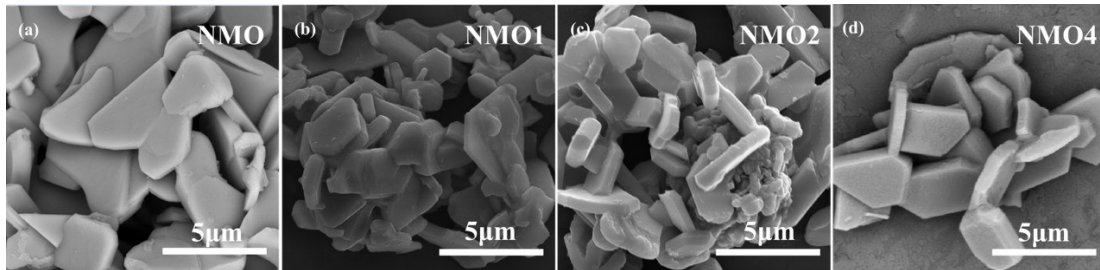

**Fig. S2.** SEM; (a) NMO, (b) NMO1, (c) NMO2, and (d) NMO4.

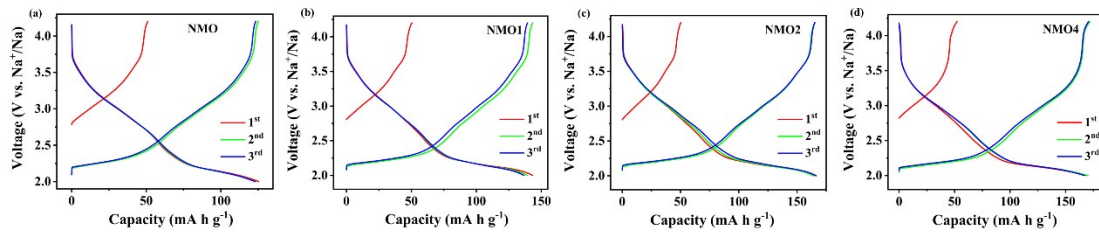

**Fig. S3.** 0.1C cycle of (a) NMO, (b) NMO1, (c) NMO2, and (d) NMO4.

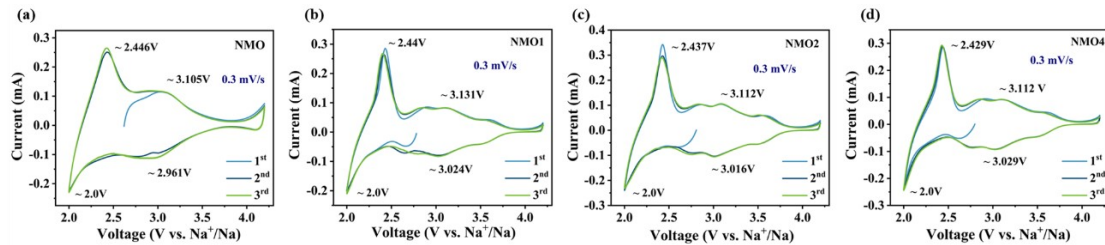

**Fig. S4.** Multi-sweep CVs of (a) NMO, (b) NMO1, (c) NMO2, and (d) NMO4.

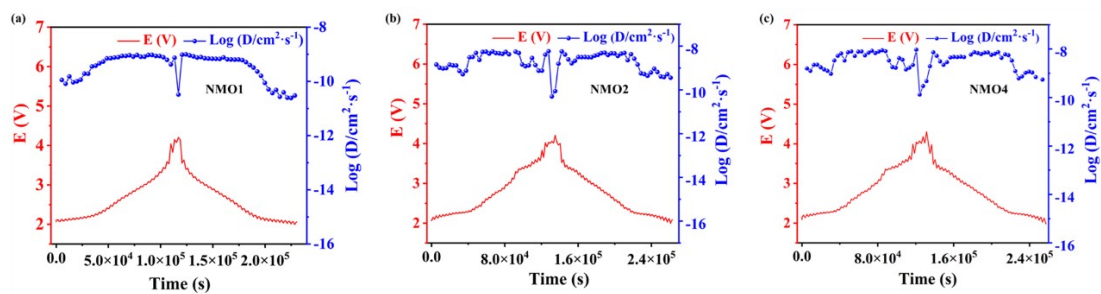

**Fig. S5.** GITT and corresponding  $D_{\text{Na}^+}$  (a-c) for NMO1, NMO2, and NMO4.

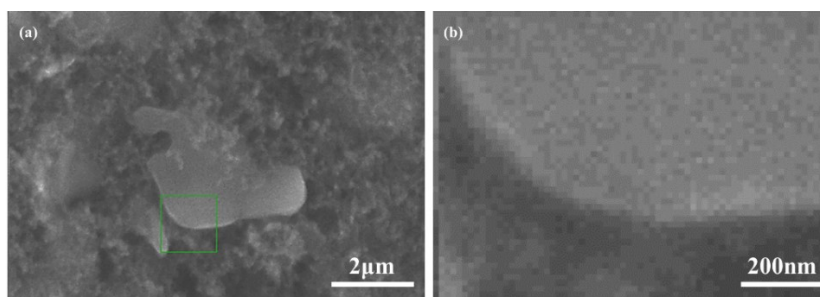

**Fig. S6.** Area of the selected SEM image of NMO3 after 600 cycles.

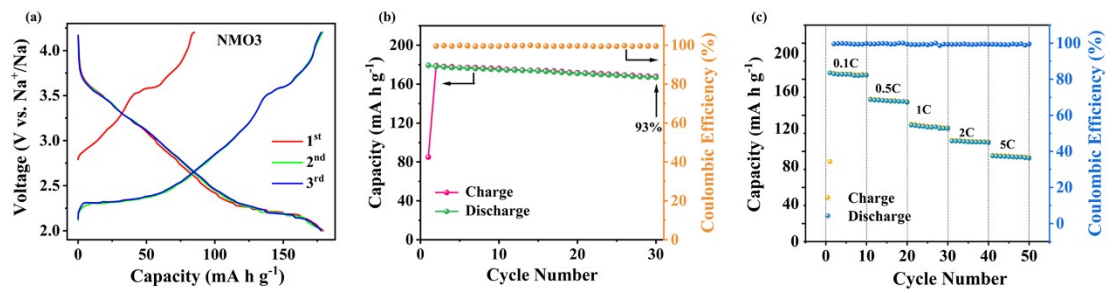

**Fig. S7.** Charge-discharge curves of NMO3 with higher loading of  $5\text{ mg/cm}^2$  at 0.1 C (a); Cycling at 0.1 C (b); Rate performance from 0.1-5 C (c).

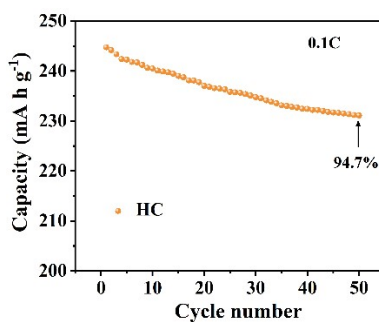

**Fig. S8.** The cycling performance of HC anode at 0.1C during 50 cycles.

**Table S1** Crystallographic parameters of NMO3 refined by the Rietveld method.

| Space group P63/mmc |            |          |                    |                     |                    |
|---------------------|------------|----------|--------------------|---------------------|--------------------|
| Lattice             | a[Å]       | c[Å]     | V[Å <sup>3</sup> ] | R <sub>wp</sub> (%) | R <sub>p</sub> (%) |
| Hexagonal           | 2.88002    | 11.21316 | 80.54733           | 6.98                | 5.04               |
| Atom                | Site       | <i>x</i> | <i>y</i>           | <i>z</i>            |                    |
| Na <sub>f</sub>     | 2 <i>b</i> | 0        | 0                  | 0.2500              |                    |
| Na <sub>e</sub>     | 2 <i>d</i> | 0.6667   | 0.3333             | 0.2500              |                    |
| Al                  | 2 <i>a</i> | 0        | 0                  | 0                   |                    |
| Mn                  | 2 <i>a</i> | 0        | 0                  | 0                   |                    |
| Zn                  | 2 <i>a</i> | 0        | 0                  | 0                   |                    |
| O                   | 4 <i>f</i> | 0.6667   | 0.3333             | 0.0875              |                    |

**Table S2** Crystallographic parameters of NMO refined by the Rietveld method.

| Space group P63/mmc |            |          |                    |                     |                    |
|---------------------|------------|----------|--------------------|---------------------|--------------------|
| Lattice             | a[Å]       | c[Å]     | V[Å <sup>3</sup> ] | R <sub>wp</sub> (%) | R <sub>p</sub> (%) |
| Hexagonal           | 2.87390    | 11.18814 | 80.025842          | 8.82                | 5.43               |
| Atom                | Site       | <i>x</i> | <i>y</i>           | <i>z</i>            |                    |
| Na <sub>f</sub>     | 2 <i>b</i> | 0        | 0                  | 0.2500              |                    |
| Na <sub>e</sub>     | 2 <i>d</i> | 0.6667   | 0.3333             | 0.2500              |                    |
| Mn                  | 2 <i>a</i> | 0        | 0                  | 0                   |                    |
| O                   | 4 <i>f</i> | 0.6667   | 0.3333             | 0.0875              |                    |

**Table S3** Crystallographic parameters of NMO1 refined by the Rietveld method.

| Space group P63/mmc |            |          |                    |                     |                    |
|---------------------|------------|----------|--------------------|---------------------|--------------------|
| Lattice             | a[Å]       | c[Å]     | V[Å <sup>3</sup> ] | R <sub>wp</sub> (%) | R <sub>p</sub> (%) |
| Hexagonal           | 2.87869    | 11.20614 | 80.42185           | 8.12                | 6.07               |
| Atom                | Site       | <i>x</i> | <i>y</i>           | <i>z</i>            |                    |
| Na <sub>f</sub>     | 2 <i>b</i> | 0        | 0                  | 0.2500              |                    |
| Na <sub>e</sub>     | 2 <i>d</i> | 0.6667   | 0.3333             | 0.2500              |                    |
| Al                  | 2 <i>a</i> | 0        | 0                  | 0                   |                    |

|    |    |        |        |        |
|----|----|--------|--------|--------|
| Mn | 2a | 0      | 0      | 0      |
| Zn | 2a | 0      | 0      | 0      |
| O  | 4f | 0.6667 | 0.3333 | 0.0875 |

**Table S4** Crystallographic parameters of NMO2 refined by the Rietveld method.

| Space group P63/mmc |         |          |                    |                     |                    |
|---------------------|---------|----------|--------------------|---------------------|--------------------|
| Lattice             | a[Å]    | c[Å]     | V[Å <sup>3</sup> ] | R <sub>wp</sub> (%) | R <sub>p</sub> (%) |
| Hexagonal           | 2.87940 | 11.20100 | 80.42507           | 7.76                | 5.80               |
| Atom                | Site    | <i>x</i> | <i>y</i>           | <i>z</i>            |                    |
| Na <sub>f</sub>     | 2b      | 0        | 0                  | 0.2500              |                    |
| Na <sub>e</sub>     | 2d      | 0.6667   | 0.3333             | 0.2500              |                    |
| Al                  | 2a      | 0        | 0                  | 0                   |                    |
| Mn                  | 2a      | 0        | 0                  | 0                   |                    |
| Zn                  | 2a      | 0        | 0                  | 0                   |                    |
| O                   | 4f      | 0.6667   | 0.3333             | 0.0875              |                    |

**Table S5** Crystallographic parameters of NMO4 refined by the Rietveld method.

| Space group P63/mmc |         |          |                    |                     |                    |
|---------------------|---------|----------|--------------------|---------------------|--------------------|
| Lattice             | a[Å]    | c[Å]     | V[Å <sup>3</sup> ] | R <sub>wp</sub> (%) | R <sub>p</sub> (%) |
| Hexagonal           | 2.88082 | 11.20709 | 80.54642           | 6.47                | 5.23               |
| Atom                | Site    | <i>x</i> | <i>y</i>           | <i>z</i>            |                    |
| Na <sub>f</sub>     | 2b      | 0        | 0                  | 0.2500              |                    |
| Na <sub>e</sub>     | 2d      | 0.6667   | 0.3333             | 0.2500              |                    |
| Al                  | 2a      | 0        | 0                  | 0                   |                    |
| Mn                  | 2a      | 0        | 0                  | 0                   |                    |
| Zn                  | 2a      | 0        | 0                  | 0                   |                    |
| O                   | 4f      | 0.6667   | 0.3333             | 0.0875              |                    |
